# Supplementary material for: Effect of expression alteration in flanking genes on phenotypes of St8sia2-deficient mice
Source: PubMed Central journal article supplement (PMC6754417; doi:10.1038/s41598-019-50006-5), 2019-09-20
Supplement: 41598_2019_50006_MOESM1_ESM.pdf [file 41598_2019_50006_MOESM1_ESM.pdf]

**Supplementary Information**

**Effect of expression alteration in flanking genes on  
phenotypes of *St8sia2*-deficient mice**

**Keisuke Ikegami<sup>1,#\*</sup>, Kazumasa Saigoh<sup>2,3</sup>, Atsuko Fujioka<sup>1</sup>, Mamoru Nagano<sup>1</sup>,  
Ken Kitajima<sup>4</sup>, Chihiro Sato<sup>4</sup>, Satoru Masubuchi<sup>5</sup>, Susumu Kusunoki<sup>2</sup>, Yasufumi  
Shigeyoshi<sup>1\*</sup>**

*<sup>1</sup> Department of Anatomy and Neurobiology, Kindai University Faculty of Medicine,  
377-2 Ohno-Higashi, Osaka-Sayama, Osaka 589-8511, Japan*

*<sup>2</sup>Department of Neurology, Kindai University Faculty of Medicine, 377-2 Ohno-  
Higashi, Osaka-Sayama, Osaka 589-8511, Japan*

*<sup>3</sup>Department of Life Science, Faculty of Science and Engineering, Kindai University, 3-  
4-1, Kowakae, Higashi-Osaka, Osaka, Japan, 577-8502, Japan*

*<sup>4</sup> Laboratory of Animal Cell Function, Bioscience and Biotechnology Center, Nagoya  
University, Furo-cho, Chikusa-ku, Nagoya 464-8601, Japan,*

*<sup>5</sup>Department of Physiology, School of Medicine, Aichi Medical University, 1-1  
Yazakokarimata, Nagakute, Aichi, 480-1195, Japan*

*#Present address: Department of Physiology, School of Medicine, Aichi Medical  
University, 1-1 Yazakokarimata, Nagakute, Aichi, 480-1195, Japan*

\* To whom correspondence should be addressed.

Keisuke Ikegami, Ph.D.

Assistant Professor of Department of Physiology, School of Medicine,  
Aichi Medical University,  
1-1 Yazakokarimata, Nagakute, Aichi, 480-1195, Japan  
E-mail: ikegami.keisuke.910@mail.aichi-med-u.ac.jp  
Phone +81-561-62-3311; Fax +81-561-63-1289

Yasufumi Shigeyoshi, M.D. and Ph.D.  
Professor of Department of Anatomy and Neurobiology,  
Kindai University Faculty of Medicine,  
377-2 Ohno-Higashi, Osaka-Sayama, Osaka 589-8511, Japan  
E-mail: shigey@med.kindai.ac.jp  
Phone/Fax +81-72-368-1031

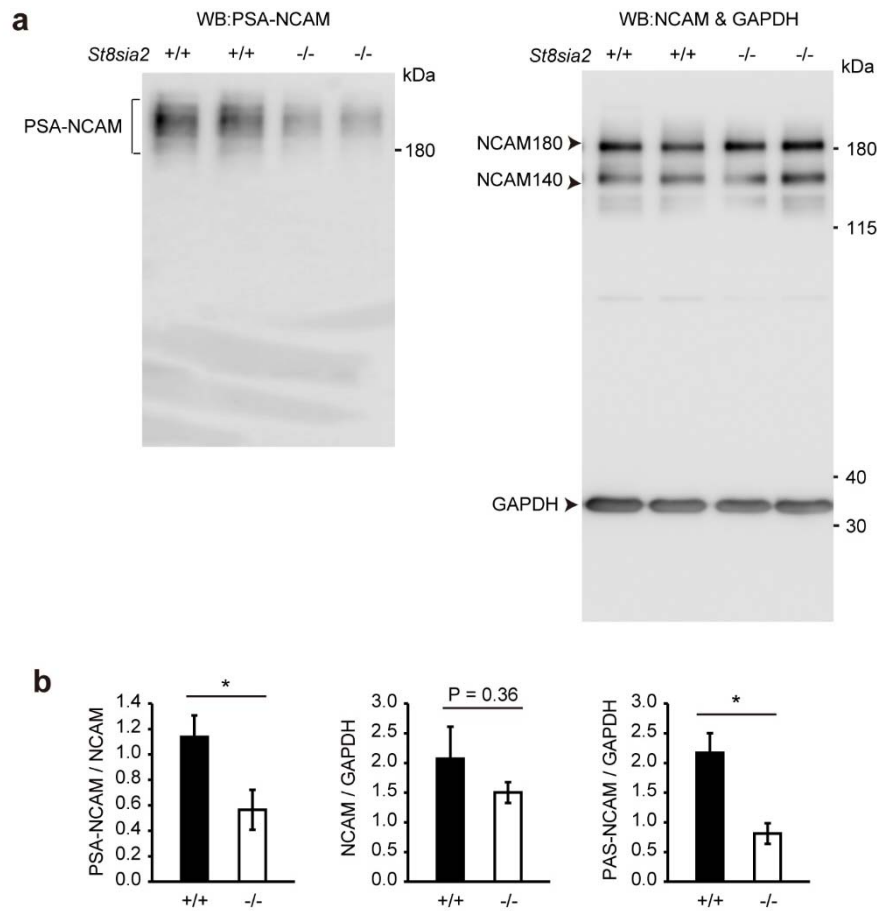

**Supplementary figure S1: Polysialic acid in NCAM in *St8sia2* <sup>-/-</sup> brains**

**a**, Western blotting and of polysialic acid (PSA) in NCAM (PSA-NCAM; bracket), total NCAM (arrowhead), and GAPDH in the dentate gyrus of the *St8sia2* <sup>+/+</sup> and <sup>-/-</sup> hippocampus. **b**, Quantification analysis of relative PSA-NCAM and NCAM. Relative PSA-NCAM decreased in the *St8sia2* <sup>-/-</sup> hippocampus. Mean  $\pm$  SEM, n = 4. \*P < 0.05, *t*-test.

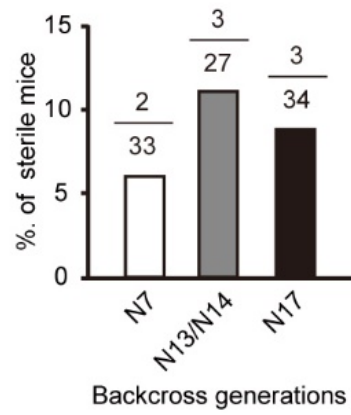

**Supplementary figure S2: Ratio of sterile mice for backcross generations**

The proportion of sterile mice in each generation was not statistically different (Fisher's exact test,  $P > 0.05$ ).

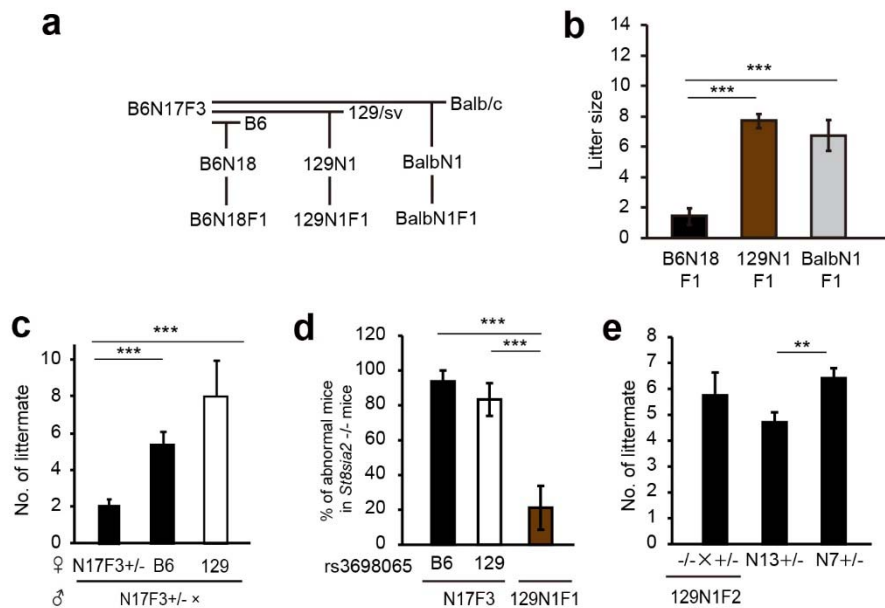

**Supplementary figure S3: B6-specific embryonic lethality in *St8sia2* <sup>-/-</sup> mice.**

**a**, Breeding scheme for backcrossing N17F3<sup>+/-</sup> with 129 or Balb/c. **b**, Litter sizes from intercrosses of <sup>+/-</sup> with each genetic background. Mean ± SEM, n = 4-9. \*\*\*P < 0.001 (One-way ANOVA, Fisher's least significant difference (LSD) test, P < 0.001). **c**, Litter sizes produced by crosses between male N17 *St8sia2* <sup>+/-</sup> mice and female N17 <sup>+/-</sup>, B6, or 129 mice. Mean ± SEM, n = 8-12. \*\*\*P < 0.001 (One-way ANOVA, LSD test, P < 0.001). **d**, Ratio of animals showing abnormal phenotypes in null mice of each generation. Mean ± SEM, n = 4-9. \*\*\*P < 0.001 (One-way ANOVA, LSD test, P < 0.001). **e**, Litter sizes produced by crosses between 129N1F2 <sup>+/-</sup> mice and <sup>-/-</sup> were recovered to a level in early (N7) and middle (N13) stages of backcrossing. \*\*P < 0.01 (One-way ANOVA, LSD test, P < 0.05).

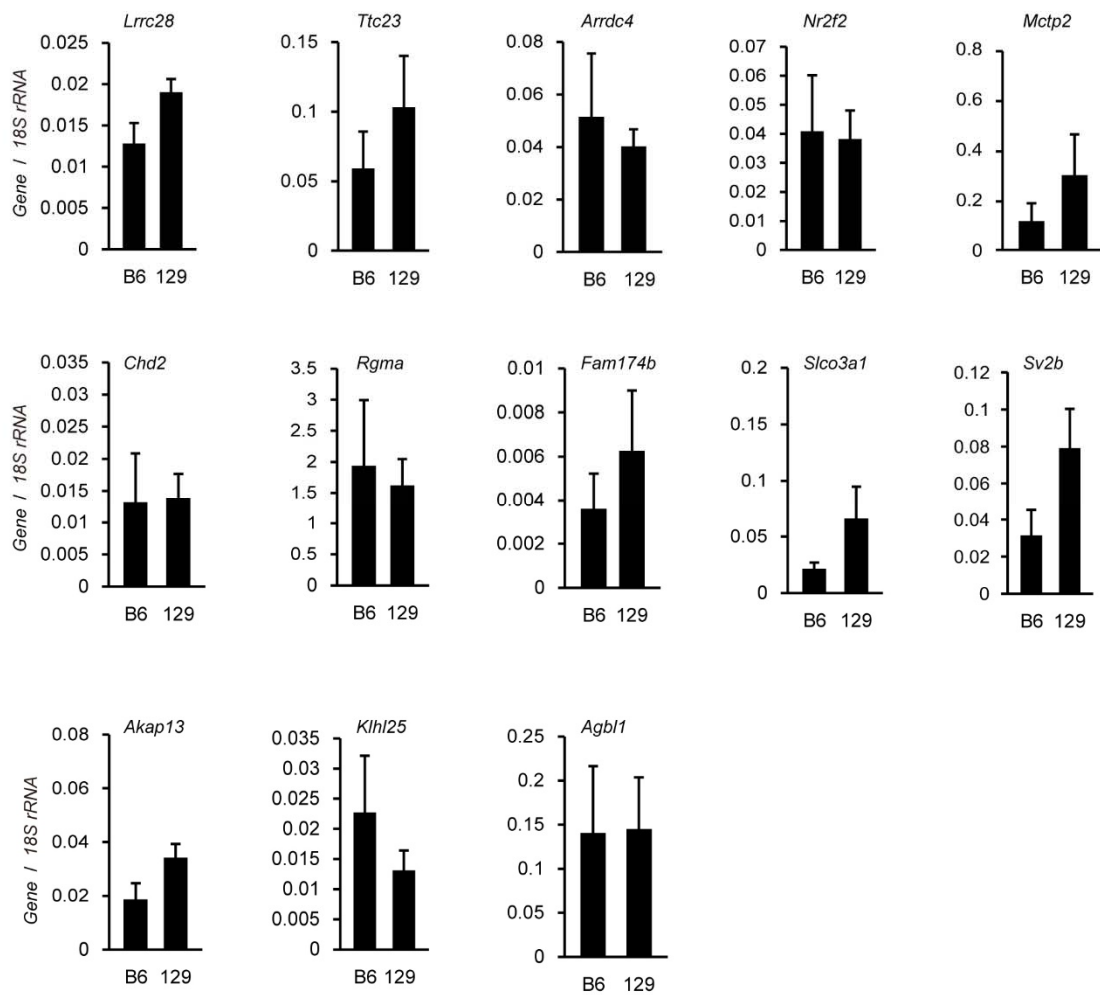

**Supplementary figure S4: Gene expression in embryonic heads of *St8sia2* <sup>-/-</sup> mice on B6 and 129 backgrounds.**

Expression profile of all flanking genes except *Synn*, *Igf1r*, and *Pgpep1l* between D7Mit297 and D7Mit30 in the embryonic head (E10.5). The amounts of each mRNA were normalized relative to 18S rRNA levels. No significant changes were observed ( $P > 0.05$ , *t*-test). Mean  $\pm$  SEM,  $n = 4$ .

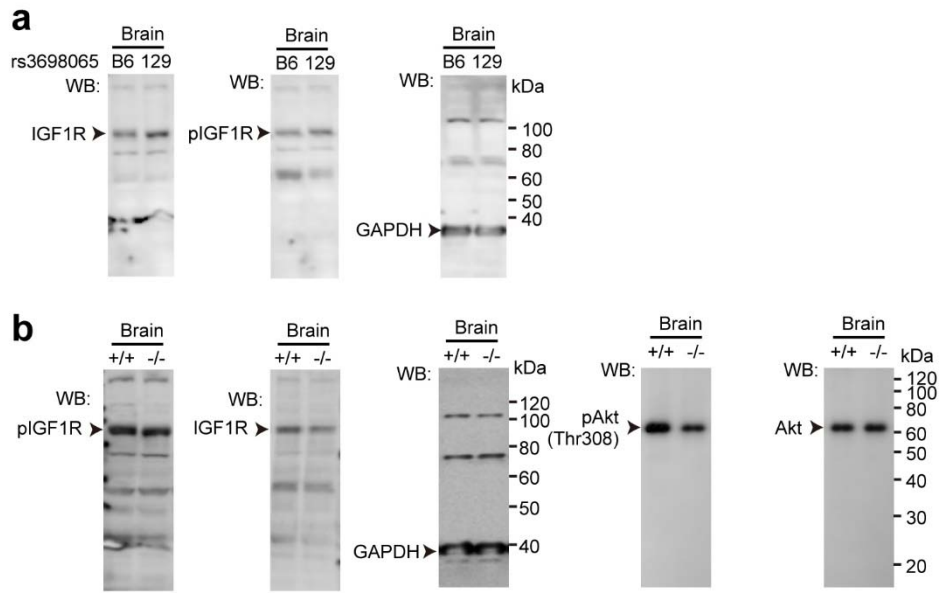

**Supplementary figure S5: Full-length blots of IGF1R and pIGF1R in Figure 4**

**a**, IGF1R expression and phosphorylation in embryonic head at E10.5 on B6 and 129 backgrounds at rs3698065. The arrowheads indicate bands showed in Figure 4. **b**, Effect of *St8sia2* deletion on IGF1R expression and phosphorylation of IGF1R and Akt. Left spots in pIGF1R blot image are signals of molecular markers. The arrowheads indicate bands showed in Figure 4.

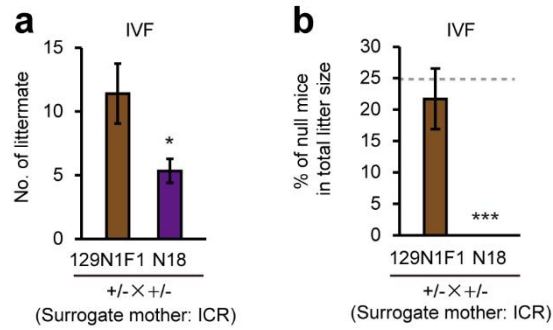

**Supplementary figure S6: Maternal effect on embryonic lethality in *St8sia2*  $-/-$  mice.**

**a,b**, Litter size (**a**) and ratios of null mice (**b**) when in vitro fertilization (IVF) embryos in heterozygous intercrossing of 129N1F1 and N18 mice transferred wild-type ICR females. Embryonic lethality is not influenced by their maternal effect. Mean  $\pm$  SEM, n = 5-9. \*P < 0.05, *t*-test.



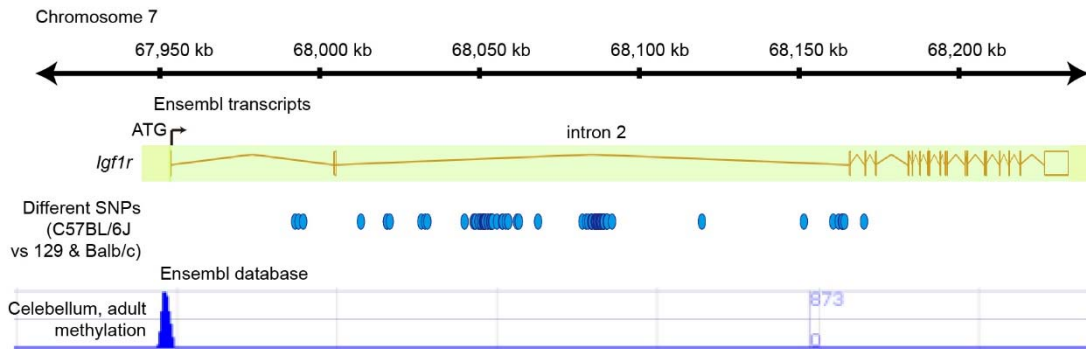

### Supplementary figure S7: SNP analysis and hypermethylated site in *Igflr*.

SNP maps generated from the Mouse Genomes Project - Query SNPs (Wellcome Trust Sanger Institute; [https://www.sanger.ac.uk/sanger/Mouse\\_SnpViewer/rel-1303](https://www.sanger.ac.uk/sanger/Mouse_SnpViewer/rel-1303)). SNP maps cover the region surrounding the *Igflr* gene (coding region  $\pm 10$  kbp, green belt [top]) in 3 strains of mice. *Igflr* of B6 is the reference sequence when compared with 129 and Balb/c strains of mice. Light blue ellipses (middle) differences between SNPs of 129 and Balb/c and B6. Many SNPs were observed in intron 2, but a few SNPs were located in other introns. Although high methylation of the *Igflr* promoter in the cerebellum of adult mice (ENSEMBL database) is known (down), no different SNPs were found in the *Igflr* promoter.

| ID       | PCR product size (bp) |     | Forward (5'→3')          | Reverse (5'→3')             | MGI position (cM) |
|----------|-----------------------|-----|--------------------------|-----------------------------|-------------------|
|          | B6                    | 129 |                          |                             |                   |
| D7Mit178 | 203                   | 165 | ACCTCTGATTTTCAGAACCCCTTG | TAGAGAGCCACTAGCATATCATAACC  | 0.5               |
| D7Mit22  | 223                   | 199 | AGCCCCCTTCTTCTCCAAGAG    | TGAAGGAGTAGTCAACAGAGTAAATGC | 8                 |
| D7Mit156 | 146                   | 127 | CCCTCACCCCTCTTTGTCAA     | TCCTTAGGGAAGGGAGTAGACC      | 16                |
| D7Mit121 | 145                   | 167 | ACCTGCATCTGTGCACATGT     | ATTGGAGTTTTATTATACAAGTGGTTG | 28.1              |
| D7Mit297 | 146                   | 161 | CCCACAGAGGGCATGAAC       | CTGAGGGATTACCTAGATCAATTAGG  | 35.28             |
| D7Mit30  | 234                   | 245 | CCAGGCTATTCTGTGATGTTG    | GGATGACTCCTAAGGAATGGC       | 37                |
| D7Mit31  | 240                   | 232 | TTCAAACCATCCAGTAAGTCCA   | TTGGTGAAGTCTTCAATGC         | 44                |
| D7Mit44  | 305                   | 313 | TTCTGGCCTCTGTGAAGTAGTG   | GTGAAACCATGGTGCAGATG        | 49.8              |
| D7Mit281 | 112                   | 139 | TTCTCTACCTCCTGAGCCA      | GCCACAAGGAAGACACCATT        | 52.4              |
| D7Mit40  | 203                   | 220 | GTCAACAGTCAGGAAAGCTGG    | CAGATGCTTGATTTGCAAAGC       | 53                |
| D7Mit104 | 135                   | 154 | CACCAAACAGTGTAATAGACATGC | CCAGGGCTTTCATGAGAAAG        | 63.5              |
| D7Nds4   | 169                   | 162 | GTGACAATACATTCCTGCTGT    | CTCAGATCTTATCTCTAGCAC       | 72.4              |
| D7Mit297 | 146                   | 161 | CCCACAGAGGGCATGAAC       | CTGAGGGATTACCTAGATCAATTAGG  | 35.28             |

**Supplementary table S1: Primer sequences used in microsatellite analysis, Related to Figure 2**

| Forward (5'→3')          |                          | Reverse (5'→3')        | Chr Position (bp) |
|--------------------------|--------------------------|------------------------|-------------------|
| for B6                   | for 129                  |                        |                   |
| GACTGAGGGGTGATTCTGAC     | GACTGAGGGGTGATTCTGAT     | TTATCAAGTCATCTGAACCA   | 66128836          |
| GG GCTCATGTATCCGAAGAAGAG | GG GCTCATGTATCCGAAGAAGAA | TGGCACAGTCATCTACCAGG   | 66278500          |
| GGATGCTGGACACTGGAATCA    | GGATGCTGGACACTGGAATCG    | TTACAATACTTTAAACTGA    | 66433568          |
| ACACTTCCTGAGCGTTCCGTT    | ACACTTCCTGAGCGTTCCGTC    | CTCCATCCCTGAGACTTTCA   | 67444261          |
| AGGGTGGAACTCACAGTTGGG    | AGGGTGGAACTCACAGTTGGA    | GTC AACAGCAGATCTCGTCC  | 67447250          |
| TGGTGGGTACCACCCATGAAC    | TGGTGGGTACCACCCATGAAG    | AAGCCTAAGAGGCTTCCTGC   | 67460289          |
| AAAGCAATGCCTGCAGCCCATCA  | AAAGCAATGCCTGCAGCCCATCG  | TGAGTCAGAGGAAGTAGACC   | 67467627          |
| TATTCGAGGACTCCAAGCAGC    | TATTCGAGGACTCCAAGCACA    | AGGCACTAAGATACTTCACTG  | 67651602          |
| ATGCTCTGCTGCCAGTGCGCC    | ATGCTCTGCTGCCAGTGCGCT    | ATATTGGCAAATGGAGATGCA  | 67760472          |
| GAAAGCCATTTCTATGCGCC     | GAAAGCCATTTCTATGCGCT     | AATCTTCAACTTGCTGTATT   | 68116674          |
| GGGATTCTGCTGCCTTGTTG     | GGGATTCTGCTGCCTTGTTCA    | ACACCATGGTACTTACTGCC   | 68385045          |
| CTAACTTTCACATTGCCACTA    | CTAACTTTCACATTGCCACTG    | TTGGTTAAGTTTTACTGCAG   | 69249798          |
| GGAAGCATCTCCAGGCTTACC    | GGAAGCATCTCCAGGCTTACA    | CTACATCCTCTTTAGCGTGGTC | 73188704          |
| CTACATTTGGCTGGCTTGTTA    | CTACATTTGGCTGGCTTGTTTC   | ATGTGTTTGCCCCAAATGAG   | 73327985          |
| GGCACACTCCGGTTCGGCAGC    | GGCACACTCCGGTTCGGCACA    | TACTGTACATTTGCTGAAAT   | 74275366          |
| TGCAGCTTTGCTCCACACTT     | TGCAGCTTTGCTCCACACTC     | TGTAAGATAGTCAATCACTA   | 76415155          |

**Supplementary table S2: Primer sequences used in SNP analysis, Related to Figure**

**2**

| Gene           | Forward (5'→3')          | Reverse (5'→3')          |
|----------------|--------------------------|--------------------------|
| <i>Lrrc28</i>  | ACCTCCAGAGGTTGGCGATTTG   | AGAGAAAGGCACAGGTGAAGCC   |
| <i>Ttc23</i>   | AGCGTACGCGAAGCTAAAGAAGTG | TCACCGATTGCCTTGACTTCCC   |
| <i>Synm</i>    | AACAGCGTGGGTCTTGAATGGC   | AGGCTACATGGCATTGACACAGC  |
| <i>Igf1r</i>   | TGGGCAATGGAGTGCTGTATGC   | CCATTCATCAGGCACGTACACATC |
| <i>Pgpep1l</i> | TCTCCAGCTGTCTGTGCCTTAC   | CACACGGGCTGTTTATTGTCTTGG |
| <i>Arrdc4</i>  | TCGCTTTCAGCTTCCGTCTGAAC  | ACGCTCTGATCTGGAACCTGGG   |
| <i>Nr2f2</i>   | TTCCAAGAGCAAGTGGAAGCTC   | TCAGACAGACCACAGGCATCTGAG |
| <i>Mctp2</i>   | CTGGATCTGCACAAACCTTCCC   | TCGTCATTGCCGTGAGTCTTGTC  |
| <i>Chd2</i>    | GCCGTATGAGCAGTACAACAGC   | TGGAGTCATGATGGTGCCTGTC   |
| <i>Rgma</i>    | TCACAGACCACTTCCAGACATGC  | TCTTGAAGATGATGGTGAGCTTGC |
| <i>Fam174b</i> | TACACCGAACCCCTGTTCTCTGC  | ATGCTAGGCTCCAGTCCAAAGG   |
| <i>Slco3a1</i> | TCCTGTTTCCAGCAACTGAGAGTG | AGGACGATGCAGGTGAACACAG   |
| <i>Sv2b</i>    | TGGAGCATCATTCCACACTATGGC | ACTTCAGAGCCACCATGGACAC   |
| <i>Akap13</i>  | TAGGAAATGGAGCTGCCACACC   | ACCAGCTTCTCGGTTGATCGC    |
| <i>Klhl25</i>  | ACGGTGAGGATCAGGTTGGTACAC | AGGGTGTGAAGCCTTGTGGAAG   |
| <i>Agbl1</i>   | GCCATCCAAGTGCGTGAGTTTG   | GGAGCTATTCACGTCCGCATTG   |
| <i>18S</i>     | GCACAGTGTGTTGTAGAGCCTG   | GCCCTGGAACCTTATTGATCGGG  |

**Supplementary table S3: Primer sequences used in qPCR, Related to Figure 3 and Supplementary figure S4.**
